# Supplementary material for: Fluorinated graphene/sulfur hybrid cathode for high energy and high power density lithium primary batteries
Source: Royal Society of Chemistry journal article supplement (doi:10.1039/c8ra00226f), 2018-01-01
Supplement: c8ra00226f1.pdf [file c8ra00226f1.pdf]

### Supporting information

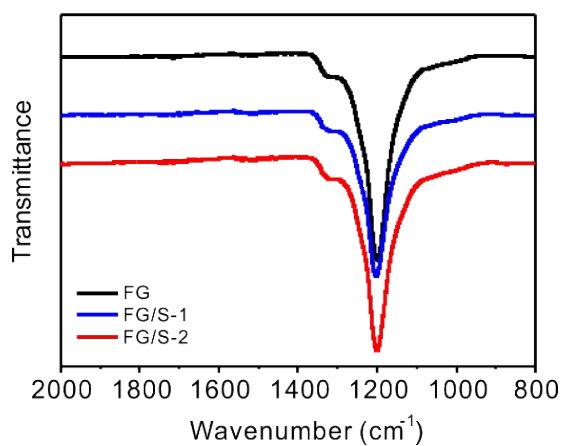

Fig.S1. The FTIR spectrum of FG, FG/S-1, and FG/S-2.

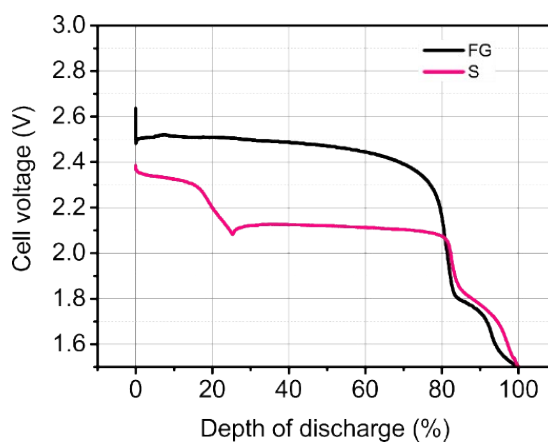

Fig.S2. Typical plots of cell voltage vs. depth of discharge for the FG and sulfur at 0.05 A g<sup>-1</sup>.

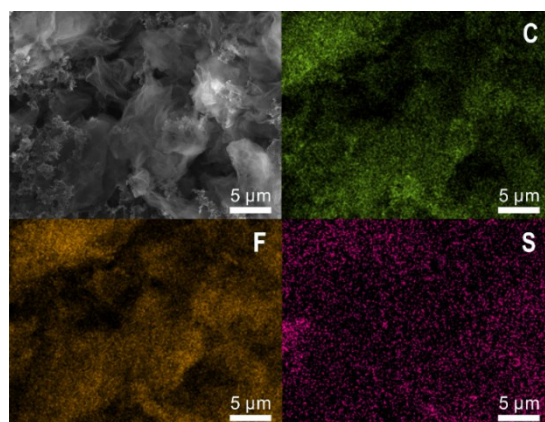

Fig.S3. The SEM morphology and corresponded element distribution for the FG/S-2 electrode.

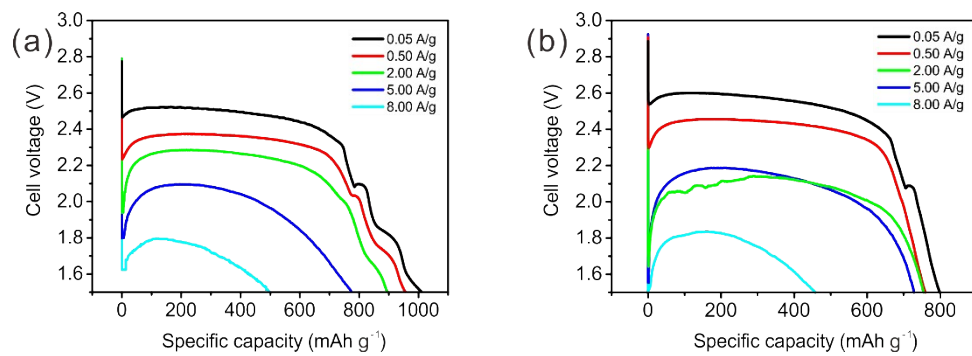

Fig.S4. The galvanostatic discharge curves of FG/S-2 electrode in the electrolyte with the additive LiNO<sub>3</sub> (a), or without LiNO<sub>3</sub> (b) at different current rates.
